# Supplementary material for: DCA1 Acts as a Transcriptional Co-activator of DST and Contributes to Drought and Salt Tolerance in Rice
Source: PLOS journal article supplement (doi:10.1371/journal.pgen.1005617), 2015-10-23

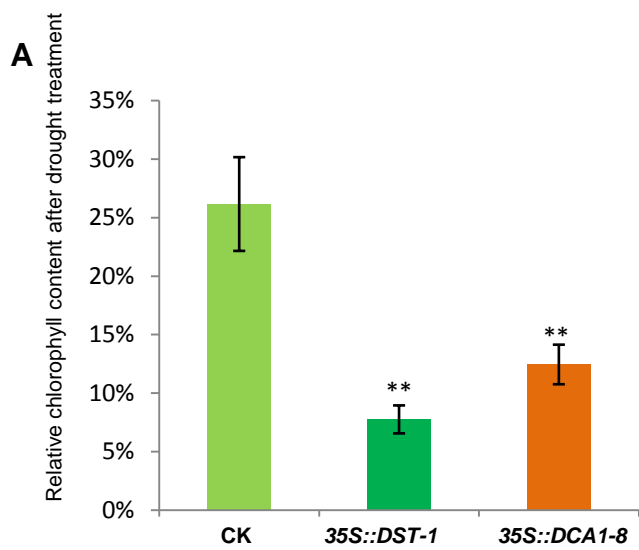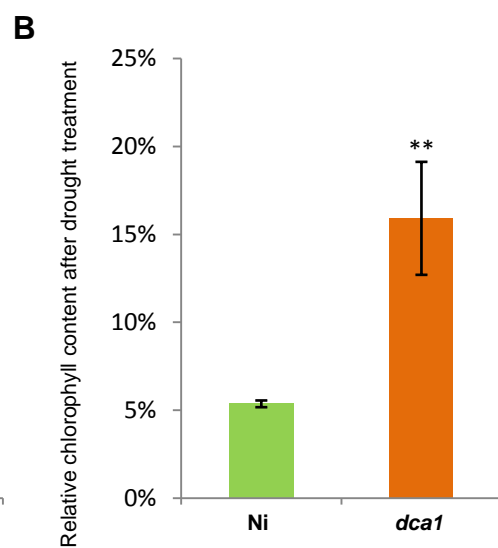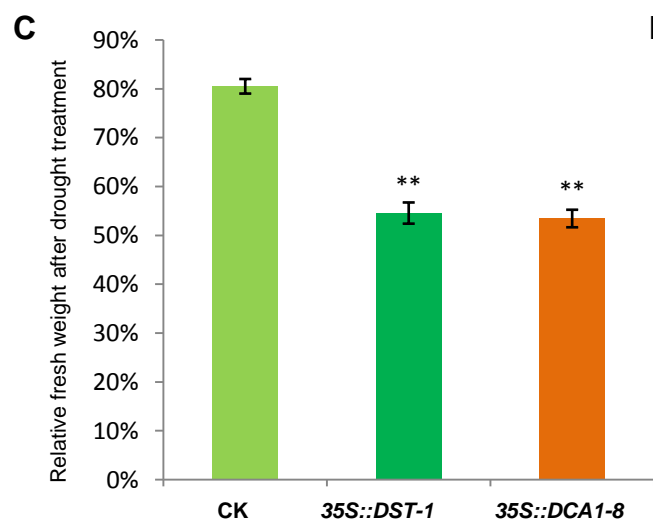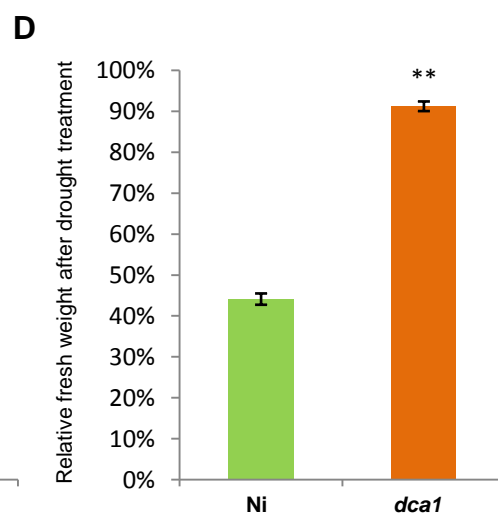

Supplement: S3 (10.1371/journal.pgen.1005617.s003) [file journal.pgen.1005617.s003]
